# Supplementary material for: Pyruvate Kinase Deficiency and Malaria
Source: Atypon-hosted journal article supplement (doi:10.1056/nejmoa072464), 2008-04-17
Supplement: nejm_ayi_1805sa1.pdf [file nejm_ayi_1805sa1.pdf]

## Supplementary Appendix

This appendix has been provided by the authors to give readers additional information about their work.

Supplement to: Ayi K, Min-Oo G, Serghides L, et al. Pyruvate kinase deficiency and malaria. *N Engl J Med* 2008;358:1805-10. DOI: [10.1056/NEJMoa072464](https://doi.org/10.1056/NEJMoa072464).

## Supplementary Appendix:

**Supplementary Table 1. *P. falciparum* merozoites derived from homozygous PK-deficient erythrocytes display normal levels of invasion and maturation in control erythrocytes.** Merozoites from *P. falciparum* parasitised PKD erythrocytes were allowed to invade and mature in control (AA) or PKD erythrocytes for two cycles of replication (See Supplementary Methods 1). Data are represented as mean (s.d.), n = 8. Statistical significance was assessed using a two tailed Student's t-test.

|     | First Cycle |           | Second Cycle |           |
|-----|-------------|-----------|--------------|-----------|
|     | I (%)       | M (%)     | I (%)        | M (%)     |
| AA  | 2.4 (1.1)   | 1.5 (1.0) | 9.9 (6.4)    | 7.6 (4.9) |
| PKD | 1.3 (0.8)   | 0.8 (0.6) | 2.6 (1.6)    | 2.4 (1.6) |
| P   | 0.0014      |           | < 0.0001     |           |

*Abbreviation:* I, invasion; M, maturation; AA, normal erythrocyte; PKD, pyruvate kinase deficient erythrocytes

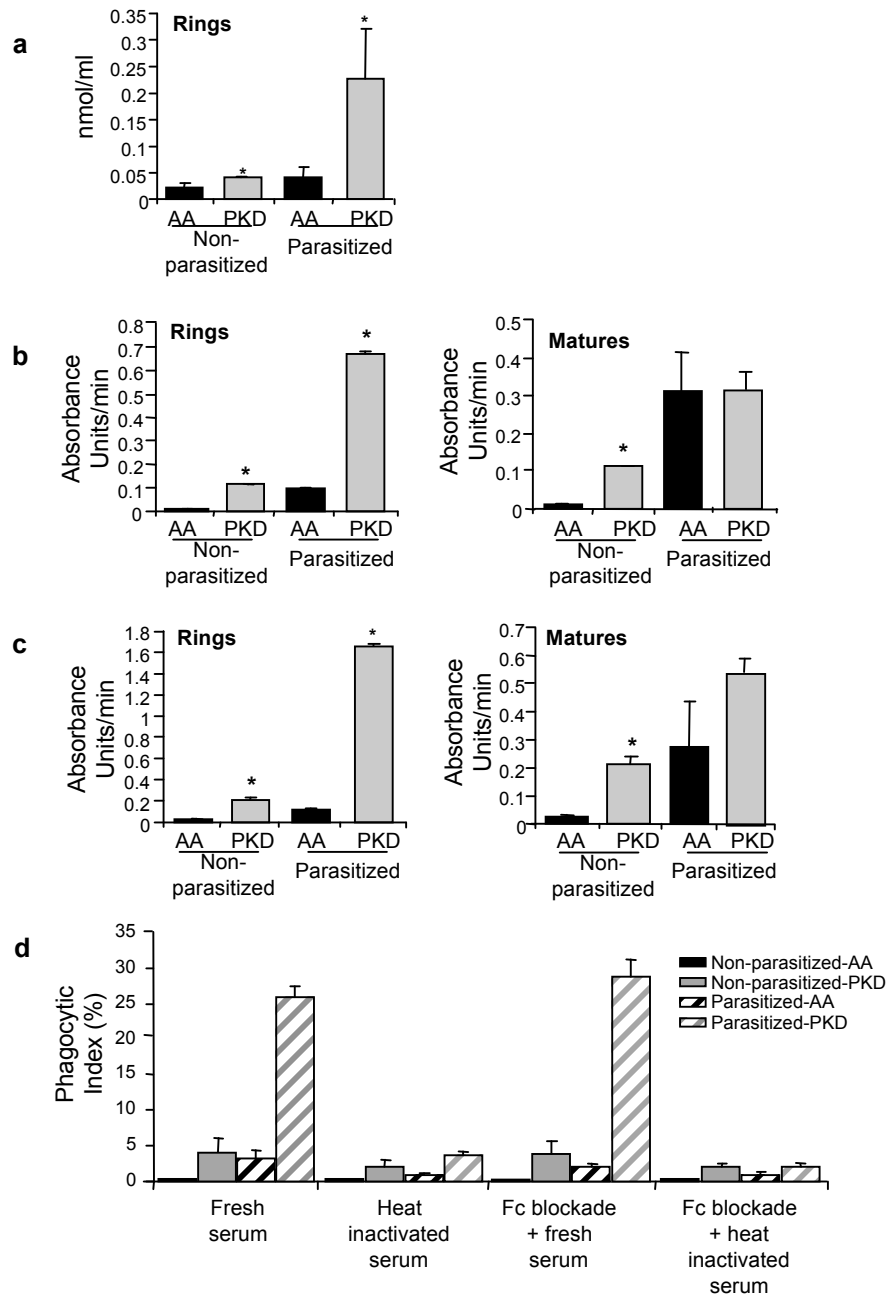

**Supplementary Figure 1. A higher level of complement binding on ring-stage parasitised PKD erythrocytes mediates their clearance by macrophages.** (a) Membrane-bound hemichromes in hypotonic extracts of non-parasitised or ring-stage parasitised normal (AA) or PKD erythrocytes, expressed as nmol/ml of membrane. Binding of IgG (b) and complement C3c fragment (c) molecules, expressed as absorbance units/min/ $10^7$  cells (See supplementary Methods 2). (d) Phagocytosis of ring-stage parasitised erythrocytes opsonised with fresh (complement containing) or heat-inactivated (no complement) human non-immune serum, with or without Fc receptor blockade using Fc fragments (See Methods). Data are shown as means  $\pm$  s.d. of 3 experiments. Statistically significant differences between normal (AA) and PKD erythrocytes were assessed by Student's *t*-test. \*,  $P < 0.0001$  for AA vs. PKD ( $n = 5$  for a, b and c; and  $n = 4$  for d).

**Supplementary Methods 1.** PK-deficient erythrocytes parasitised with *P. falciparum* clones ITG and 3D7 (mycoplasma-free) were synchronized at schizont stage (>95% purity)<sup>14,18</sup>. To assess parasite invasion and maturation, purified schizonts at 0.5% parasitemia were co-cultured with normal (AA) or PKD erythrocytes at a hematocrit of 2% as previously described<sup>15</sup>. Slides were prepared from cultures at 24 h and 72 h to assess invasion and at 48 h and 96 h to assess maturation. Slides were stained with Diff-Quik, and 2000 erythrocytes were examined microscopically. Percent parasitemia was determined as follows: number of parasitised erythrocytes (matures or ring stage) divided by the total number of erythrocytes (non-parasitised and parasitised) x 100.

**Supplementary Methods 2.** *Membrane-bound hemichromes, autologous IgG and C3c fragment.* Bound hemichromes, IgG and C3c fragment were measured as described<sup>15,18</sup>. For ring-stage parasitised erythrocytes the values were normalised to 100% parasitemia using the following formula:  $I = (Tot - N \times n) / (1 - n)$  as described<sup>15</sup>, where I indicates the amount of bound IgG and C3c in 100% rings; Tot, amount of bound IgG and C3c in the whole culture; N, amount of bound IgG and C3c in non-parasitised erythrocytes; and n, fraction of non-parasitised erythrocytes. For mature-stage parasitised erythrocytes parasitemia was 5-10%.
